# Supplementary material for: The UBR-box and its relationship to binuclear RING-like treble clef zinc fingers
Source: PubMed Central journal article supplement (PMC4506424; doi:10.1186/s13062-015-0066-5), 2015-07-17
Supplement: 13062_2015_66_MOESM2_ESM.pdf [file 13062_2015_66_MOESM2_ESM.pdf]

# Protein domains

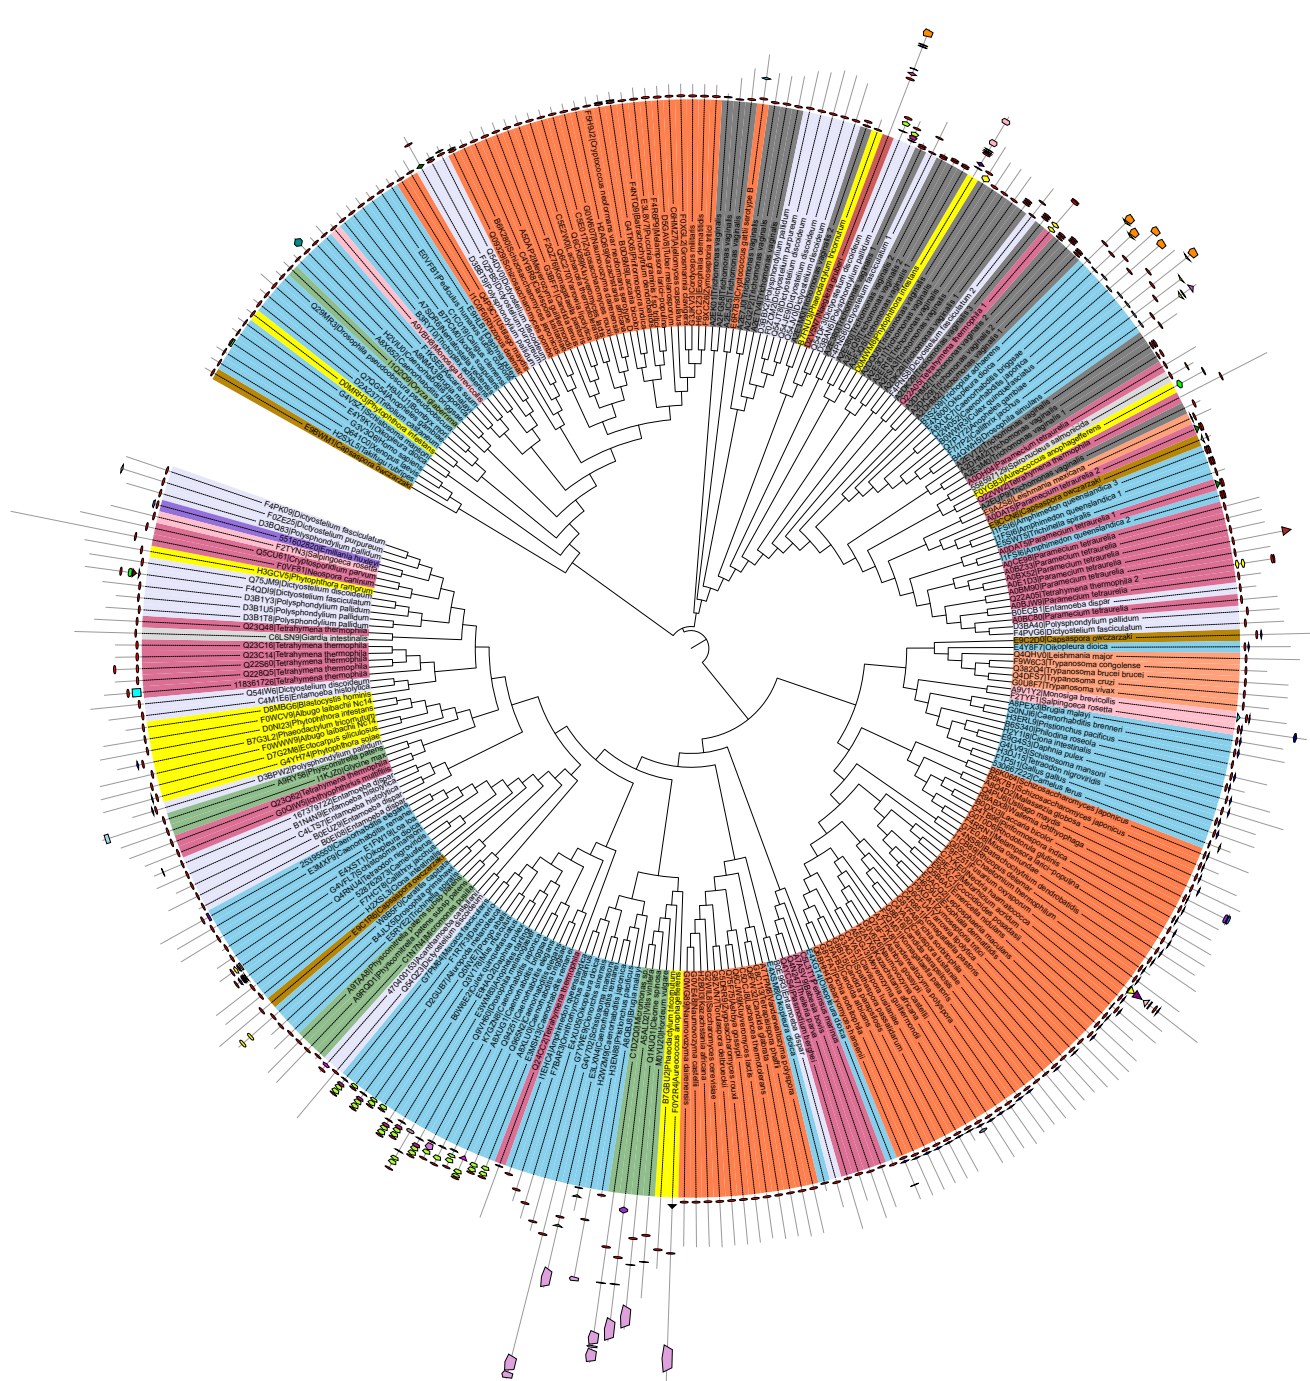

- |  |                 |  |                 |
|--|-----------------|--|-----------------|
|  | Telomerase_RBD  |  | zf-UBR          |
|  | PIG-U           |  | ClpS            |
|  | PhyH            |  | SF3b1           |
|  | PHD             |  | ELL             |
|  | DUF2013         |  | Laminin_G_3     |
|  | zf-RING_5       |  | Ribosomal_S8    |
|  | ZZ              |  | ubiquitin       |
|  | RVT_1           |  | SPRY            |
|  | zf-C3HC4        |  | Ribosomal_L32e  |
|  | zf-RING_2       |  | Cation_ATPase_N |
|  | Pkinase         |  | DNA_PPF         |
|  | zf-RanBP        |  | Acyl-CoA_dh_1   |
|  | Sirohm_synth_C  |  | Methyltransf_16 |
|  | Sirohm_synth_M  |  | Methyltransf_21 |
|  | UCH             |  | Acyl-CoA_dh_M   |
|  | ACOX            |  | Cation_ATPase_C |
|  | NAD_binding_7   |  | PABP            |
|  | Cyclin_N        |  | DOT1            |
|  | Thioredoxin     |  | Astacin         |
|  | E3_UbLigase_R4  |  | BPL_LplA_LipB   |
|  | E3_UbLigase_EDD |  | UBA             |
|  | Kelch_1         |  | Hydrolase       |
|  | RRM_1           |  | Oxysterol_BP    |
|  | RasGAP          |  | OTU             |
|  | RRM_3           |  | E1-E2_ATPase    |
|  | Beta_helix      |  | DUF4583         |
|  | NosD            |  | Asp             |
|  | Pectate_lyase_3 |  | DUF290          |
|  | F-box-like      |  | LCM             |
|  | HECT            |  | UCR_UQCRX_QCR9  |
|  |                 |  | La              |

## Taxa colors

- |  |               |  |                  |
|--|---------------|--|------------------|
|  | Amoebozoa     |  | Heterolobosea    |
|  | Alveolata     |  | Viridaeplantae   |
|  | Diplomonadida |  | Stramenopiles    |
|  | Parabasalia   |  | Fungi            |
|  | Euglenozoa    |  | Choanoflagellida |
|  | Metazoa       |  | Haptophyceae     |
|  | Ichthyosporea |  |                  |
